# Supplementary material for: Hydrogel-Based Electrodes for High-Fidelity sEMG Signal Acquisition Applied to Robotic Hand Control in Limb Function Reconstruction
Source: Research Square preprint supplement (doi:10.21203/rs.3.rs-8218905/v1), 2025-11-28
Supplement: Supplementary file 1 [file f383e041ea9b7042a9620303.docx]

**Supplementary Information**

Hydrogel-Based Electrodes for High-Fidelity sEMG Signal Acquisition Applied to Robotic Hand Control in Limb Function Reconstruction

Ziqing Yu a,b, Yunqing Gu a,b,*, Yun Ren c, Hongxin Ding a,b, Denghao Wu a,b, Zhenxing Wu a,b, Jiegang Mou a,b.

*a College of Metrology Measurement and Instrument,* *China Jiliang University, Hangzhou, 310018,*

*China*

*b Zhejiang Engineering Research Center of Fluid Equipment and Measurement and Control Technology, Hangzhou, 310018, China*

*c Zhijiang College, Zhejiang University of Technology, Shaoxing 312030, PR, China*

* Corresponding author.

*E-mail address*: guyunqing@cjlu.edu.cn (Yunqing Gu).


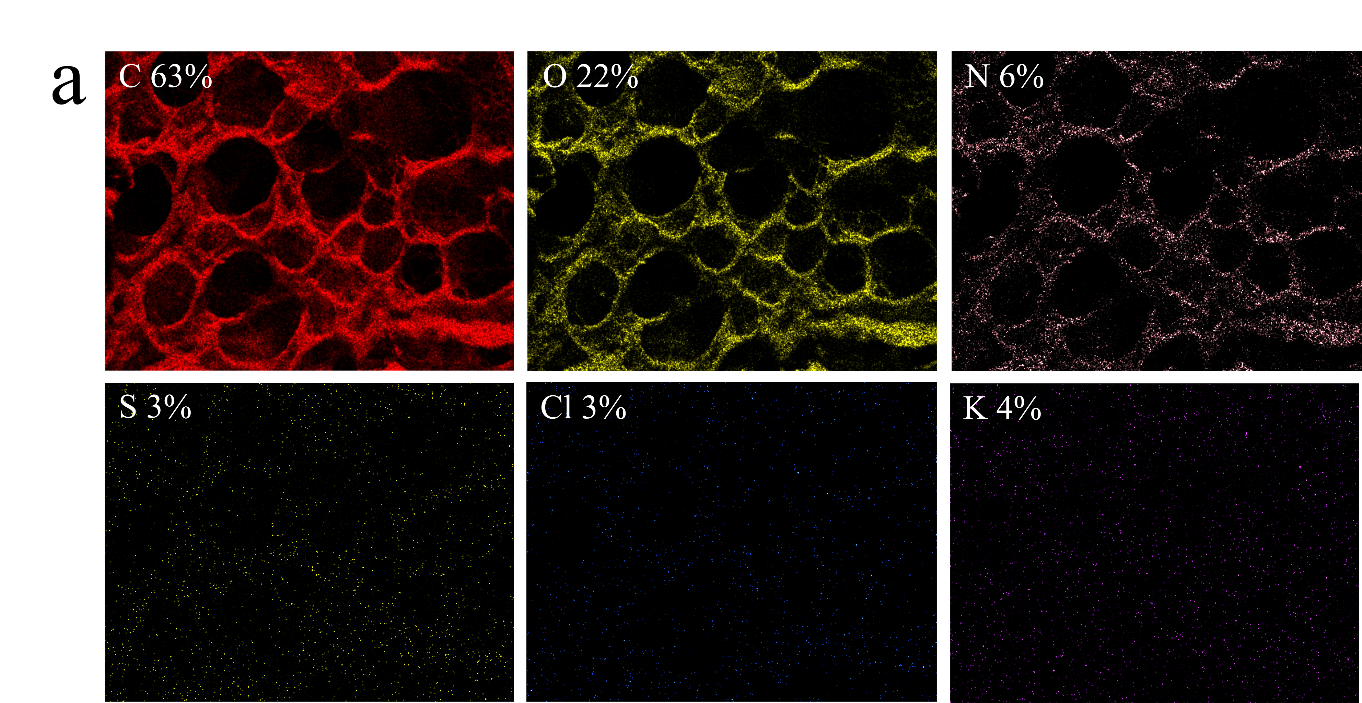


**Supplementary Figure 1. Distribution of elements C, O, N, S, Cl and K in PCGK-CT hydrogels.**

**
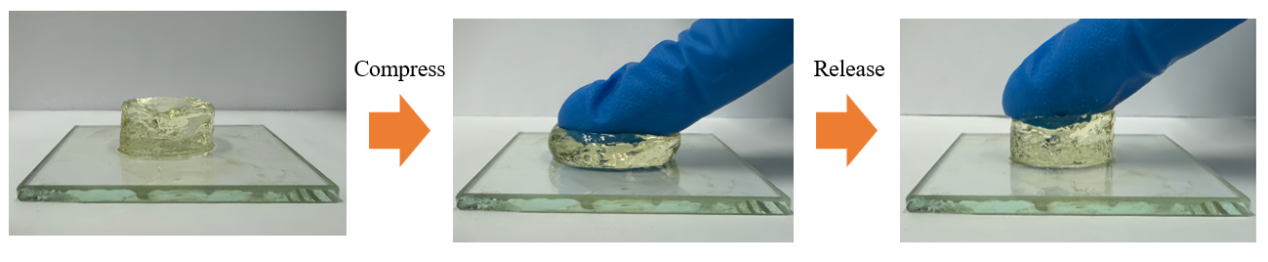
**

**Supplementary Figure 2. Compressive deformation of hydrogels. gel compression deformation.**

**
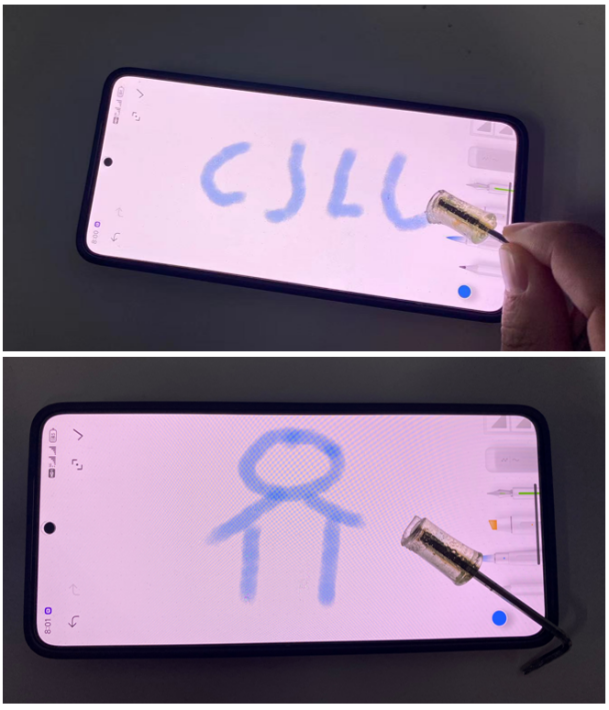
**

**
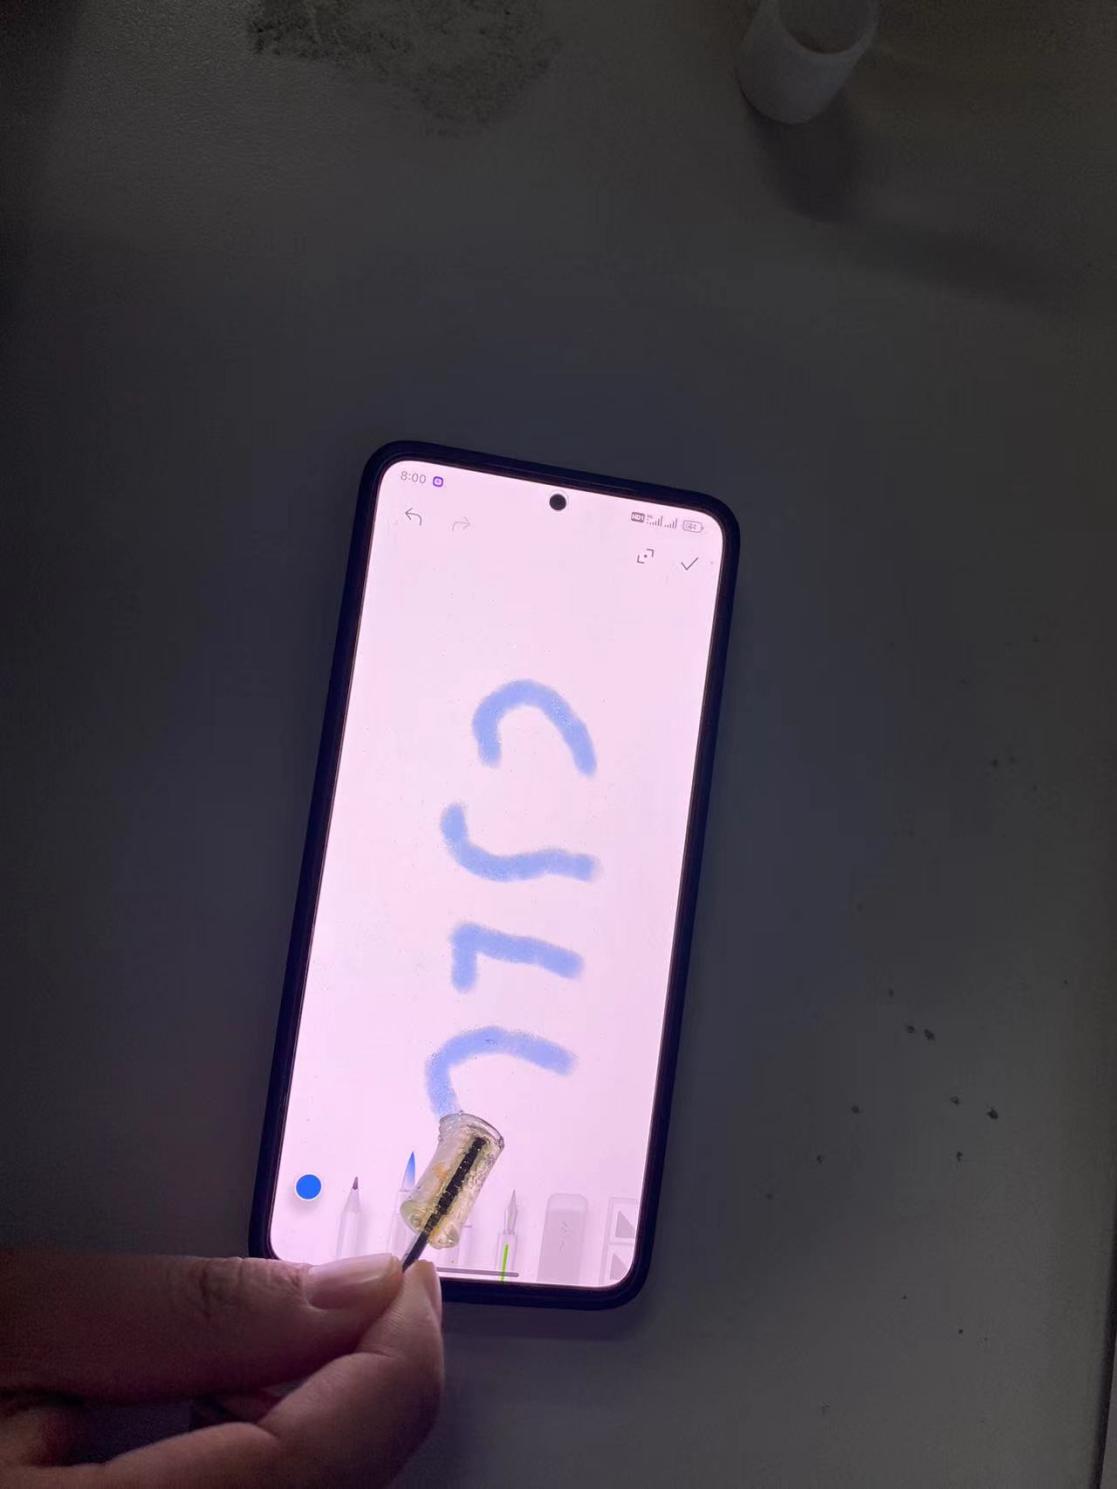

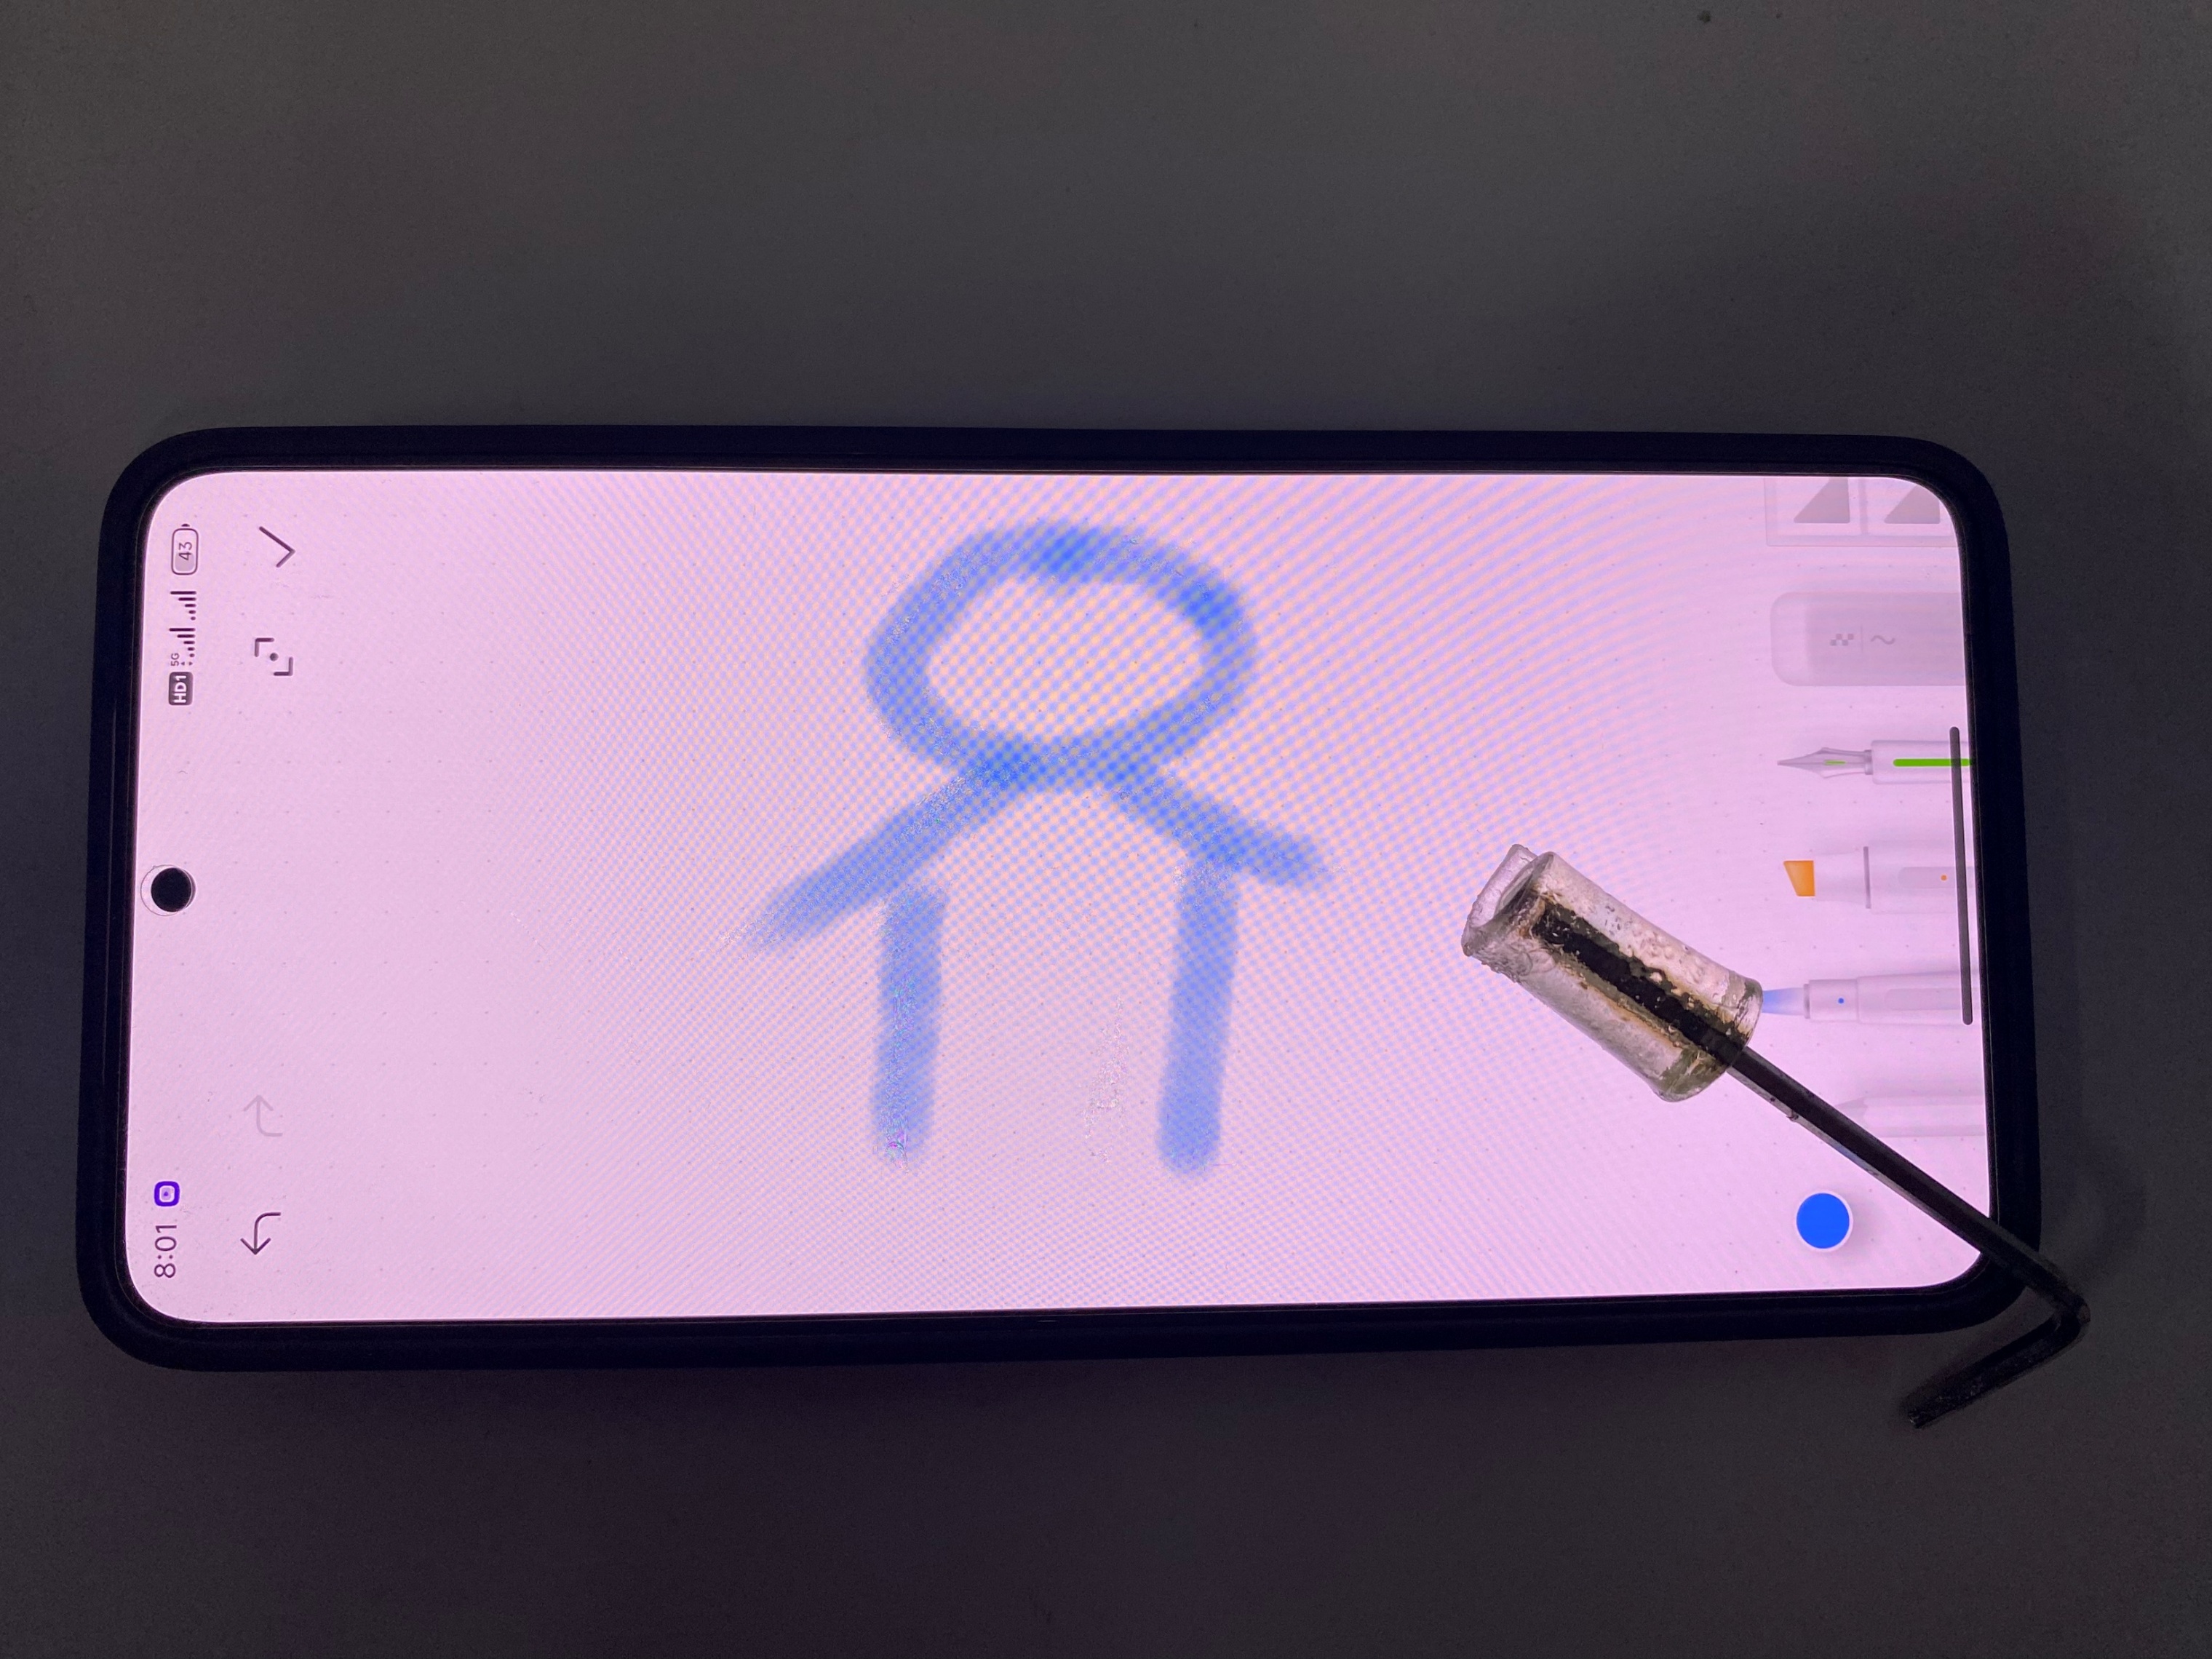

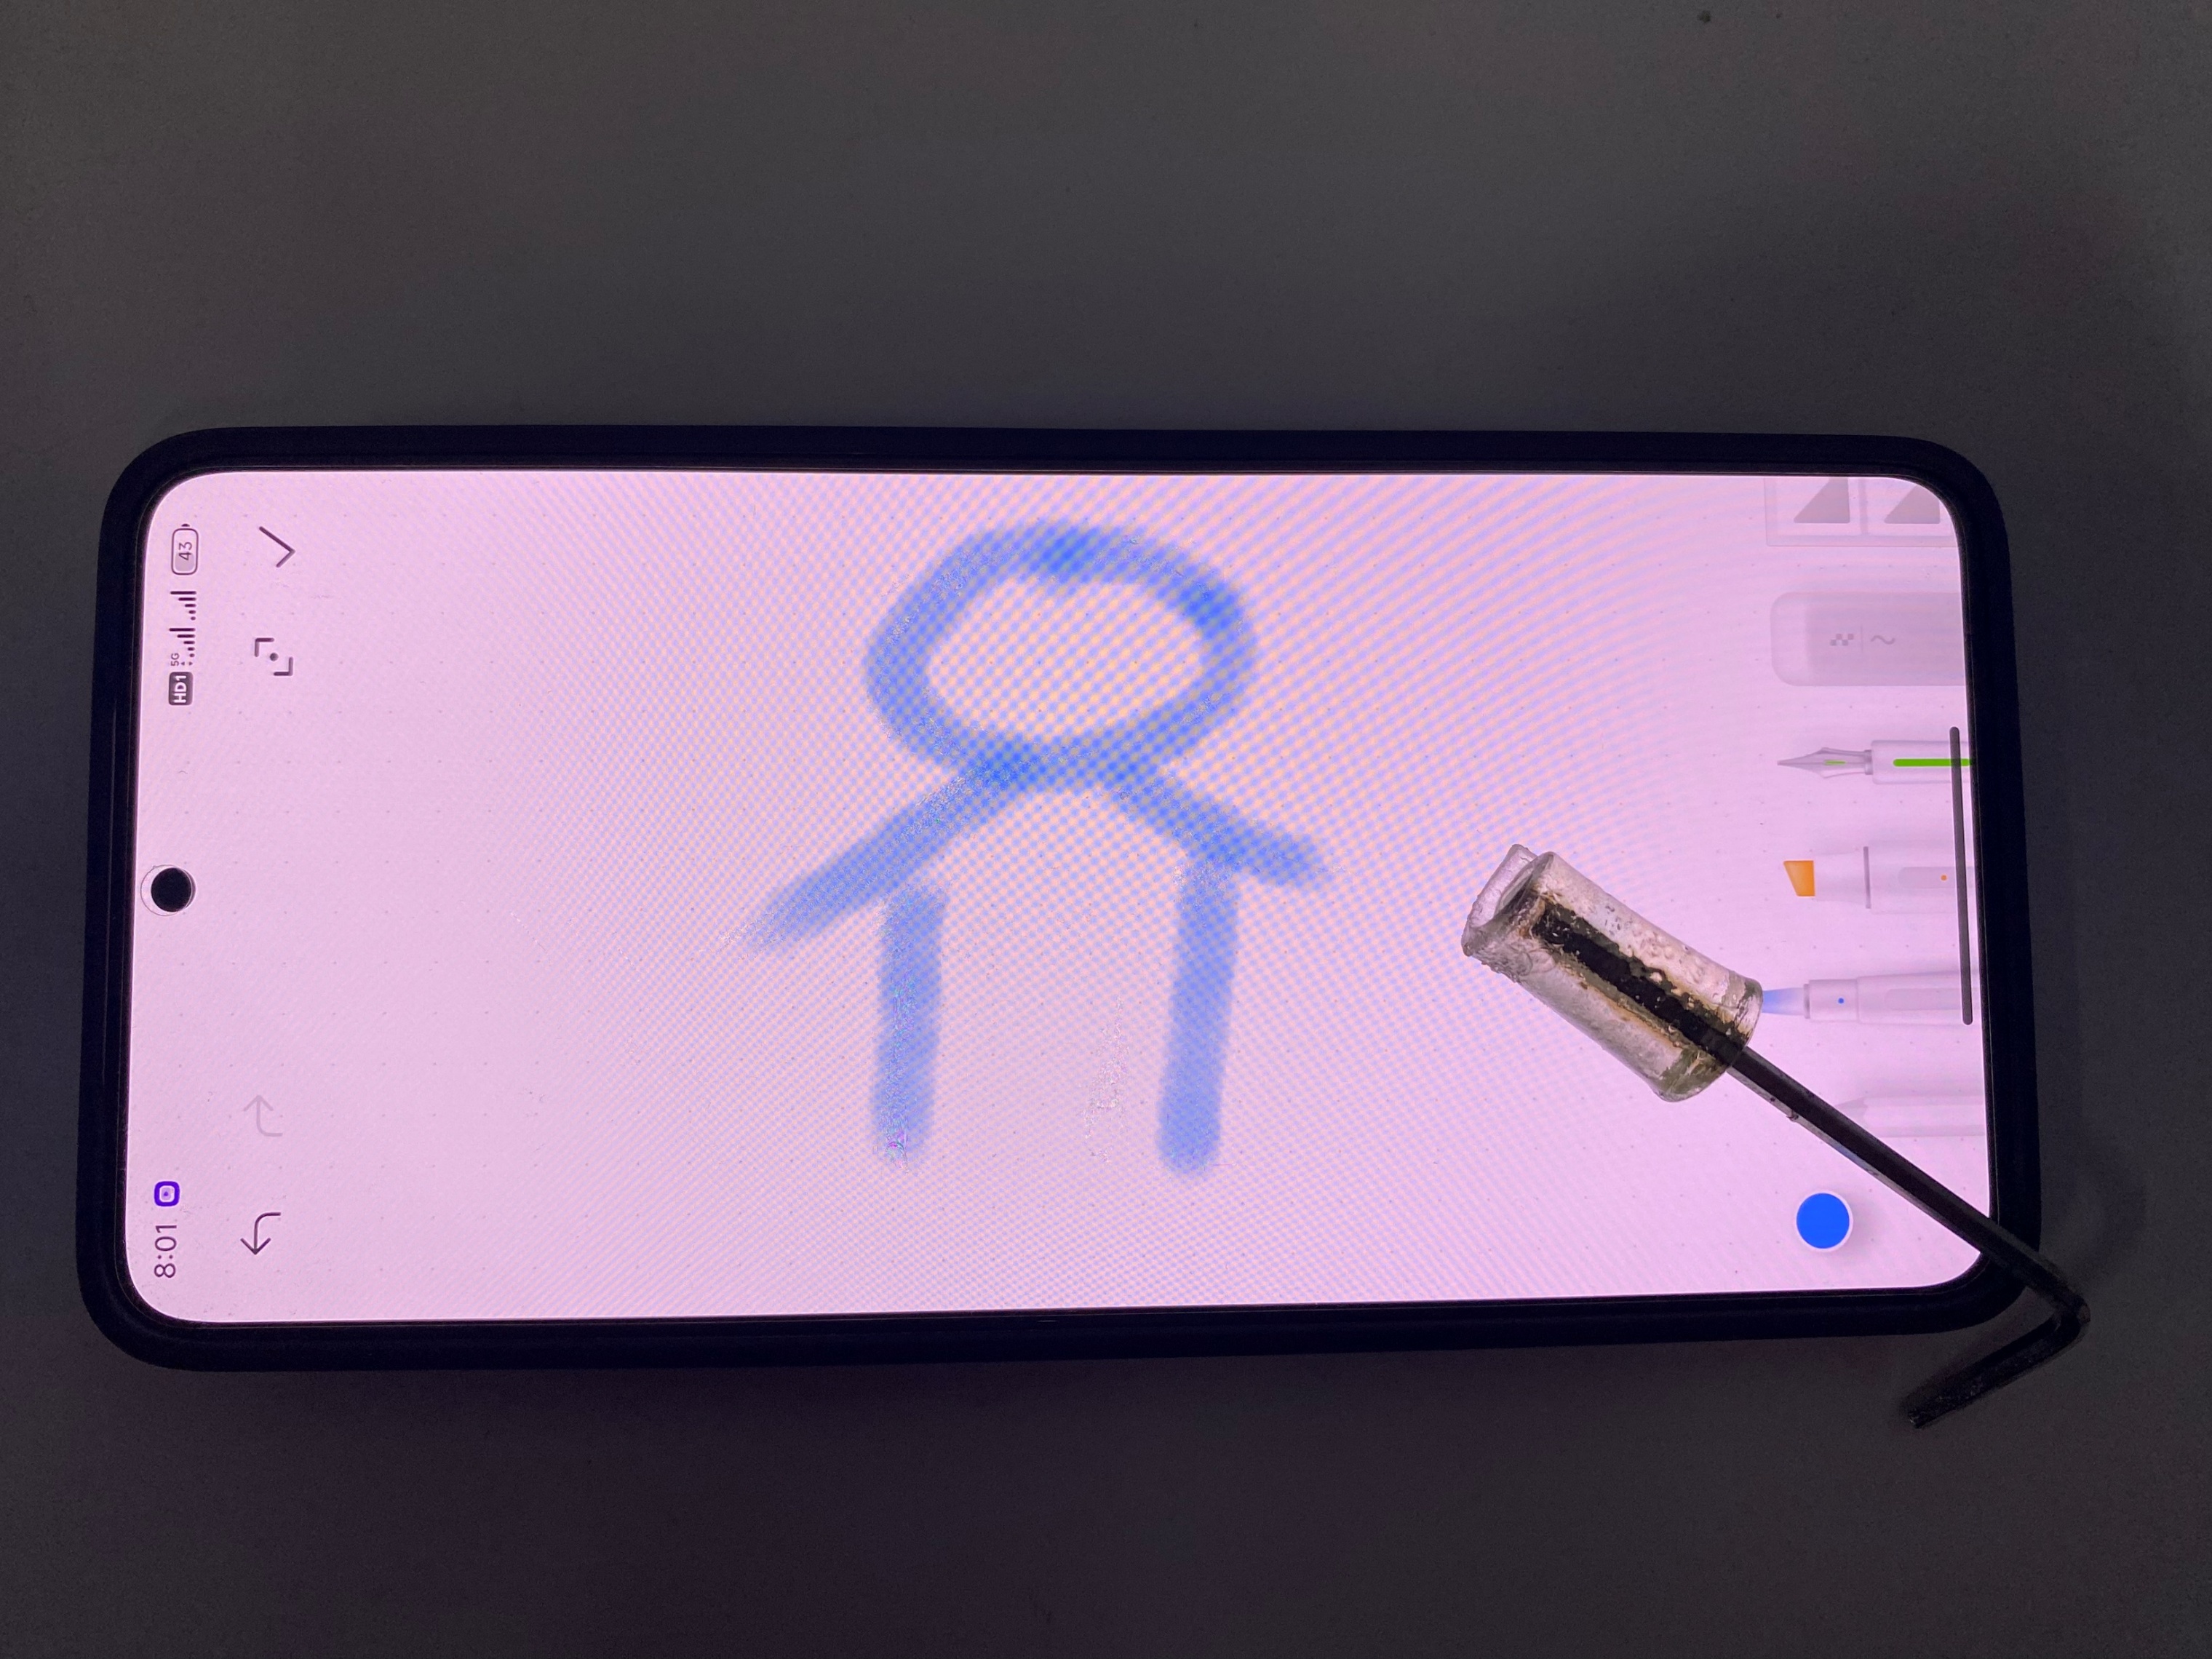

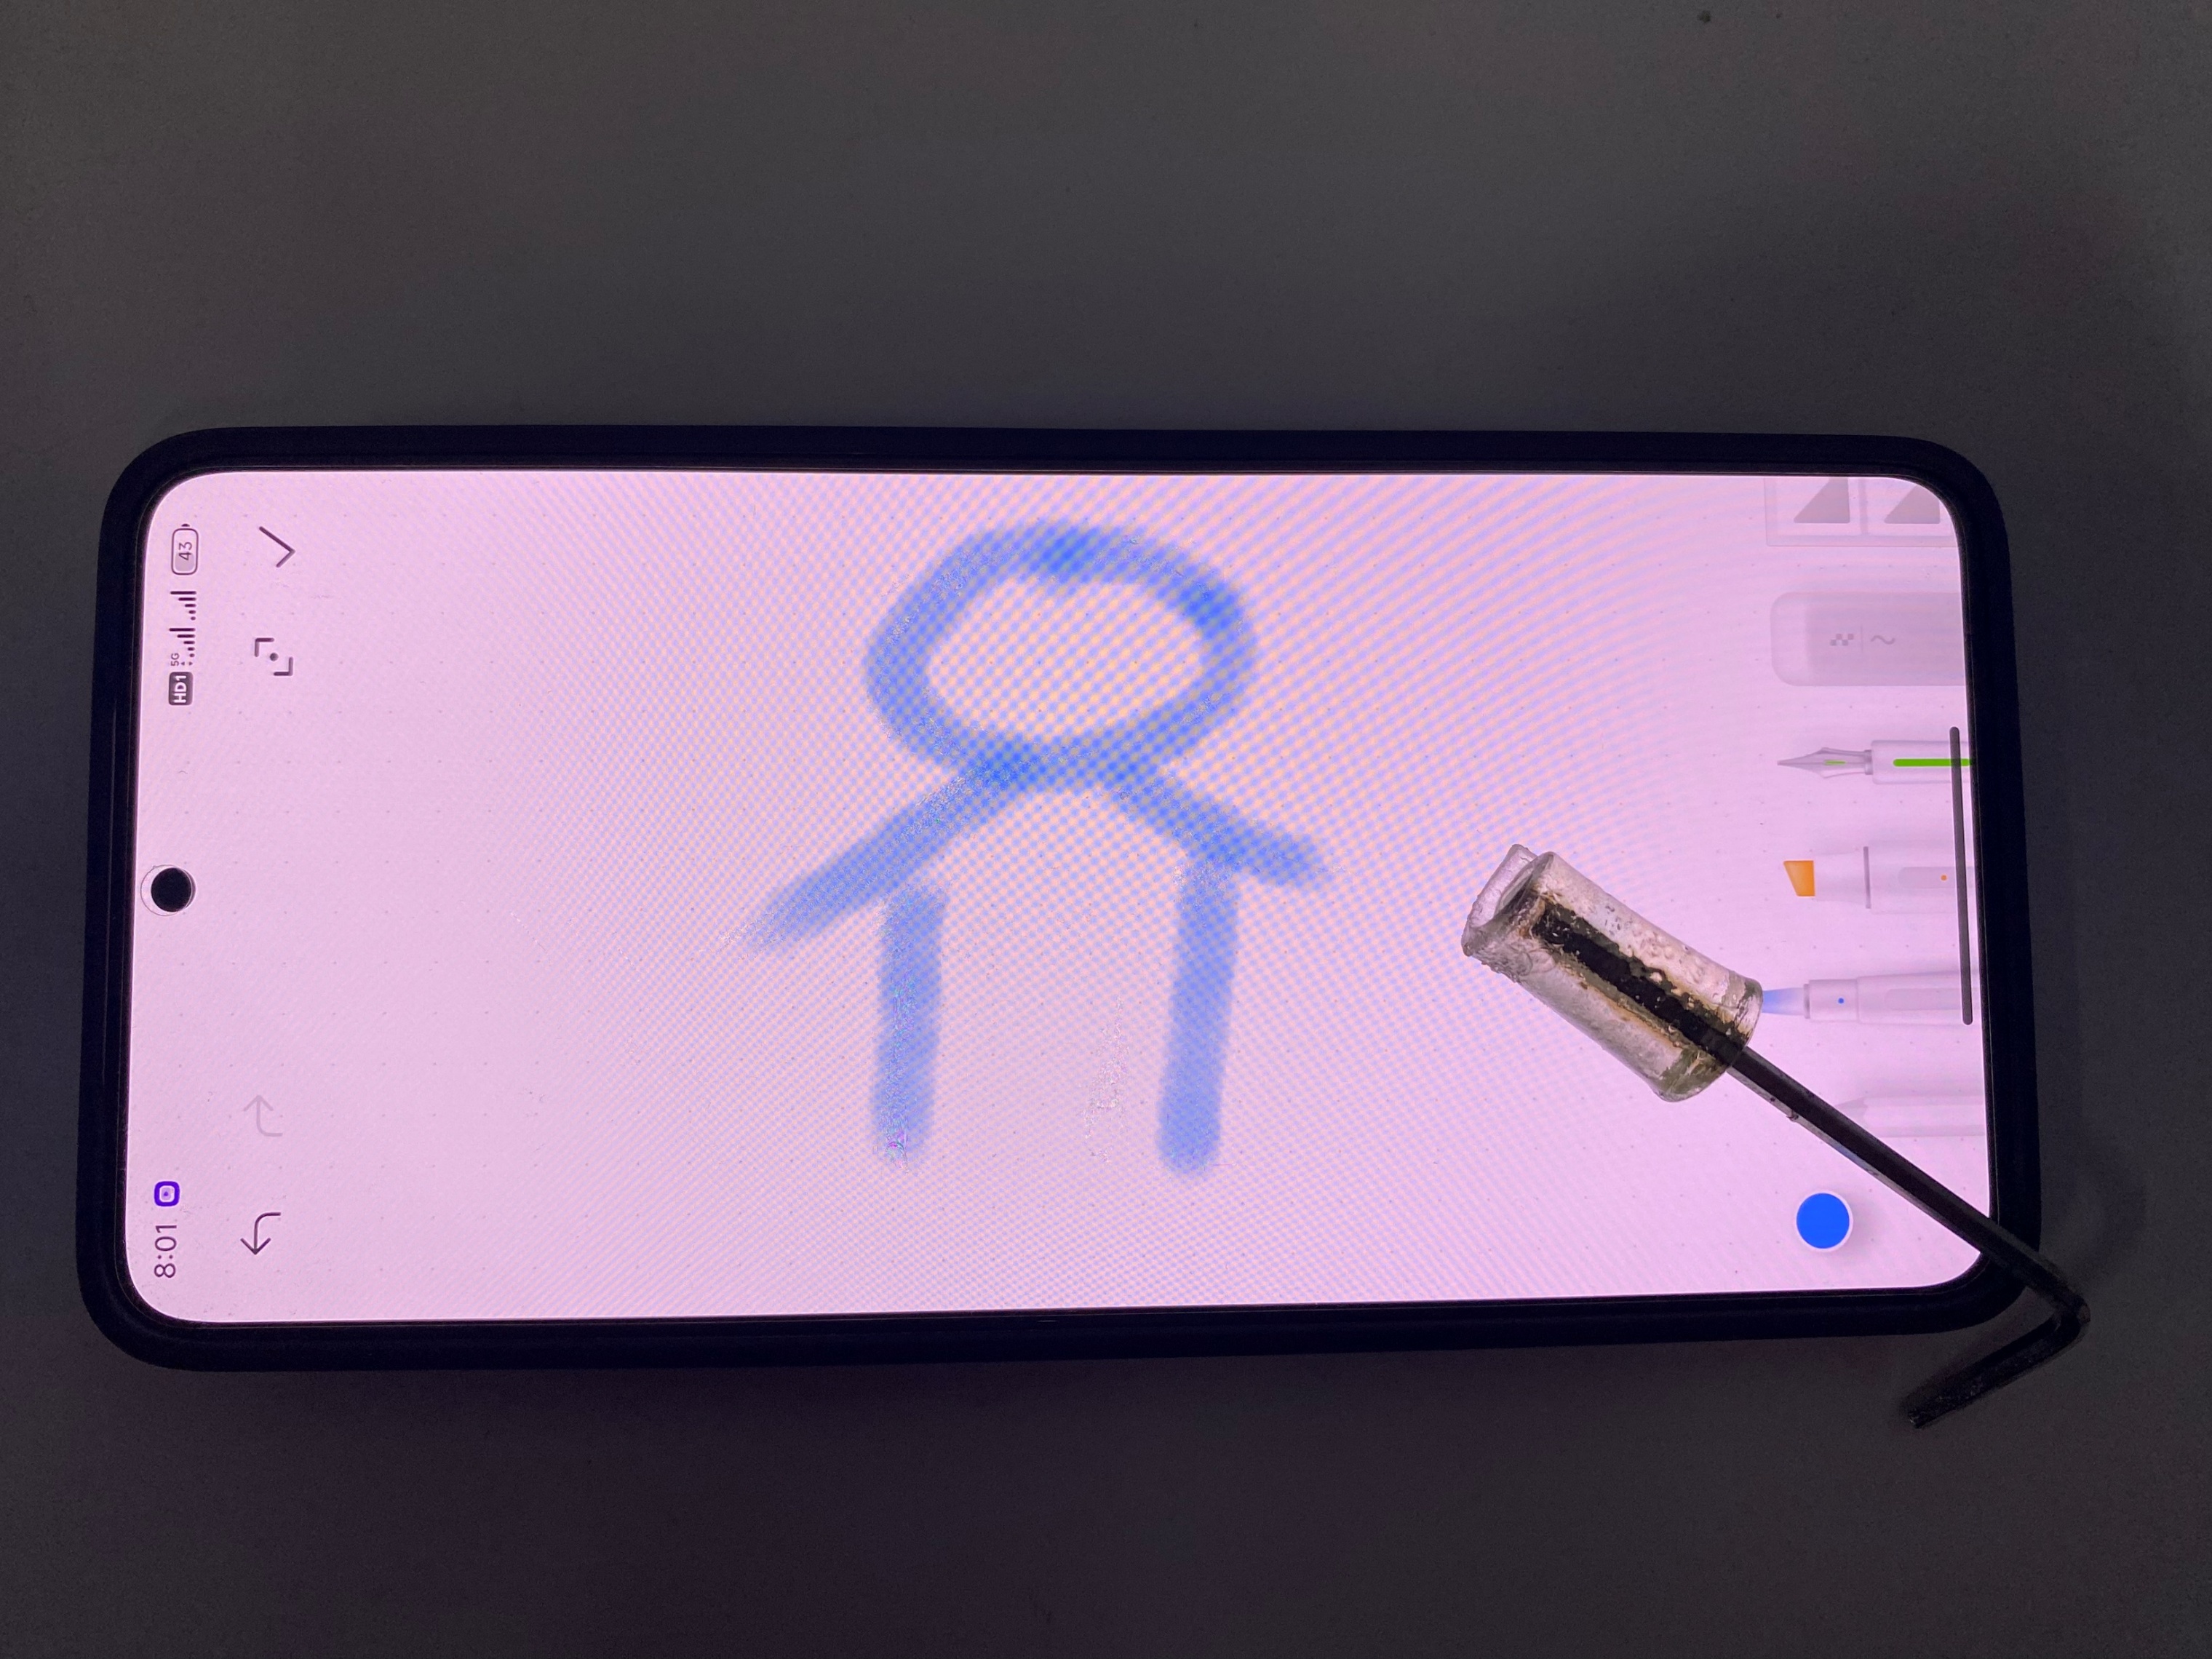

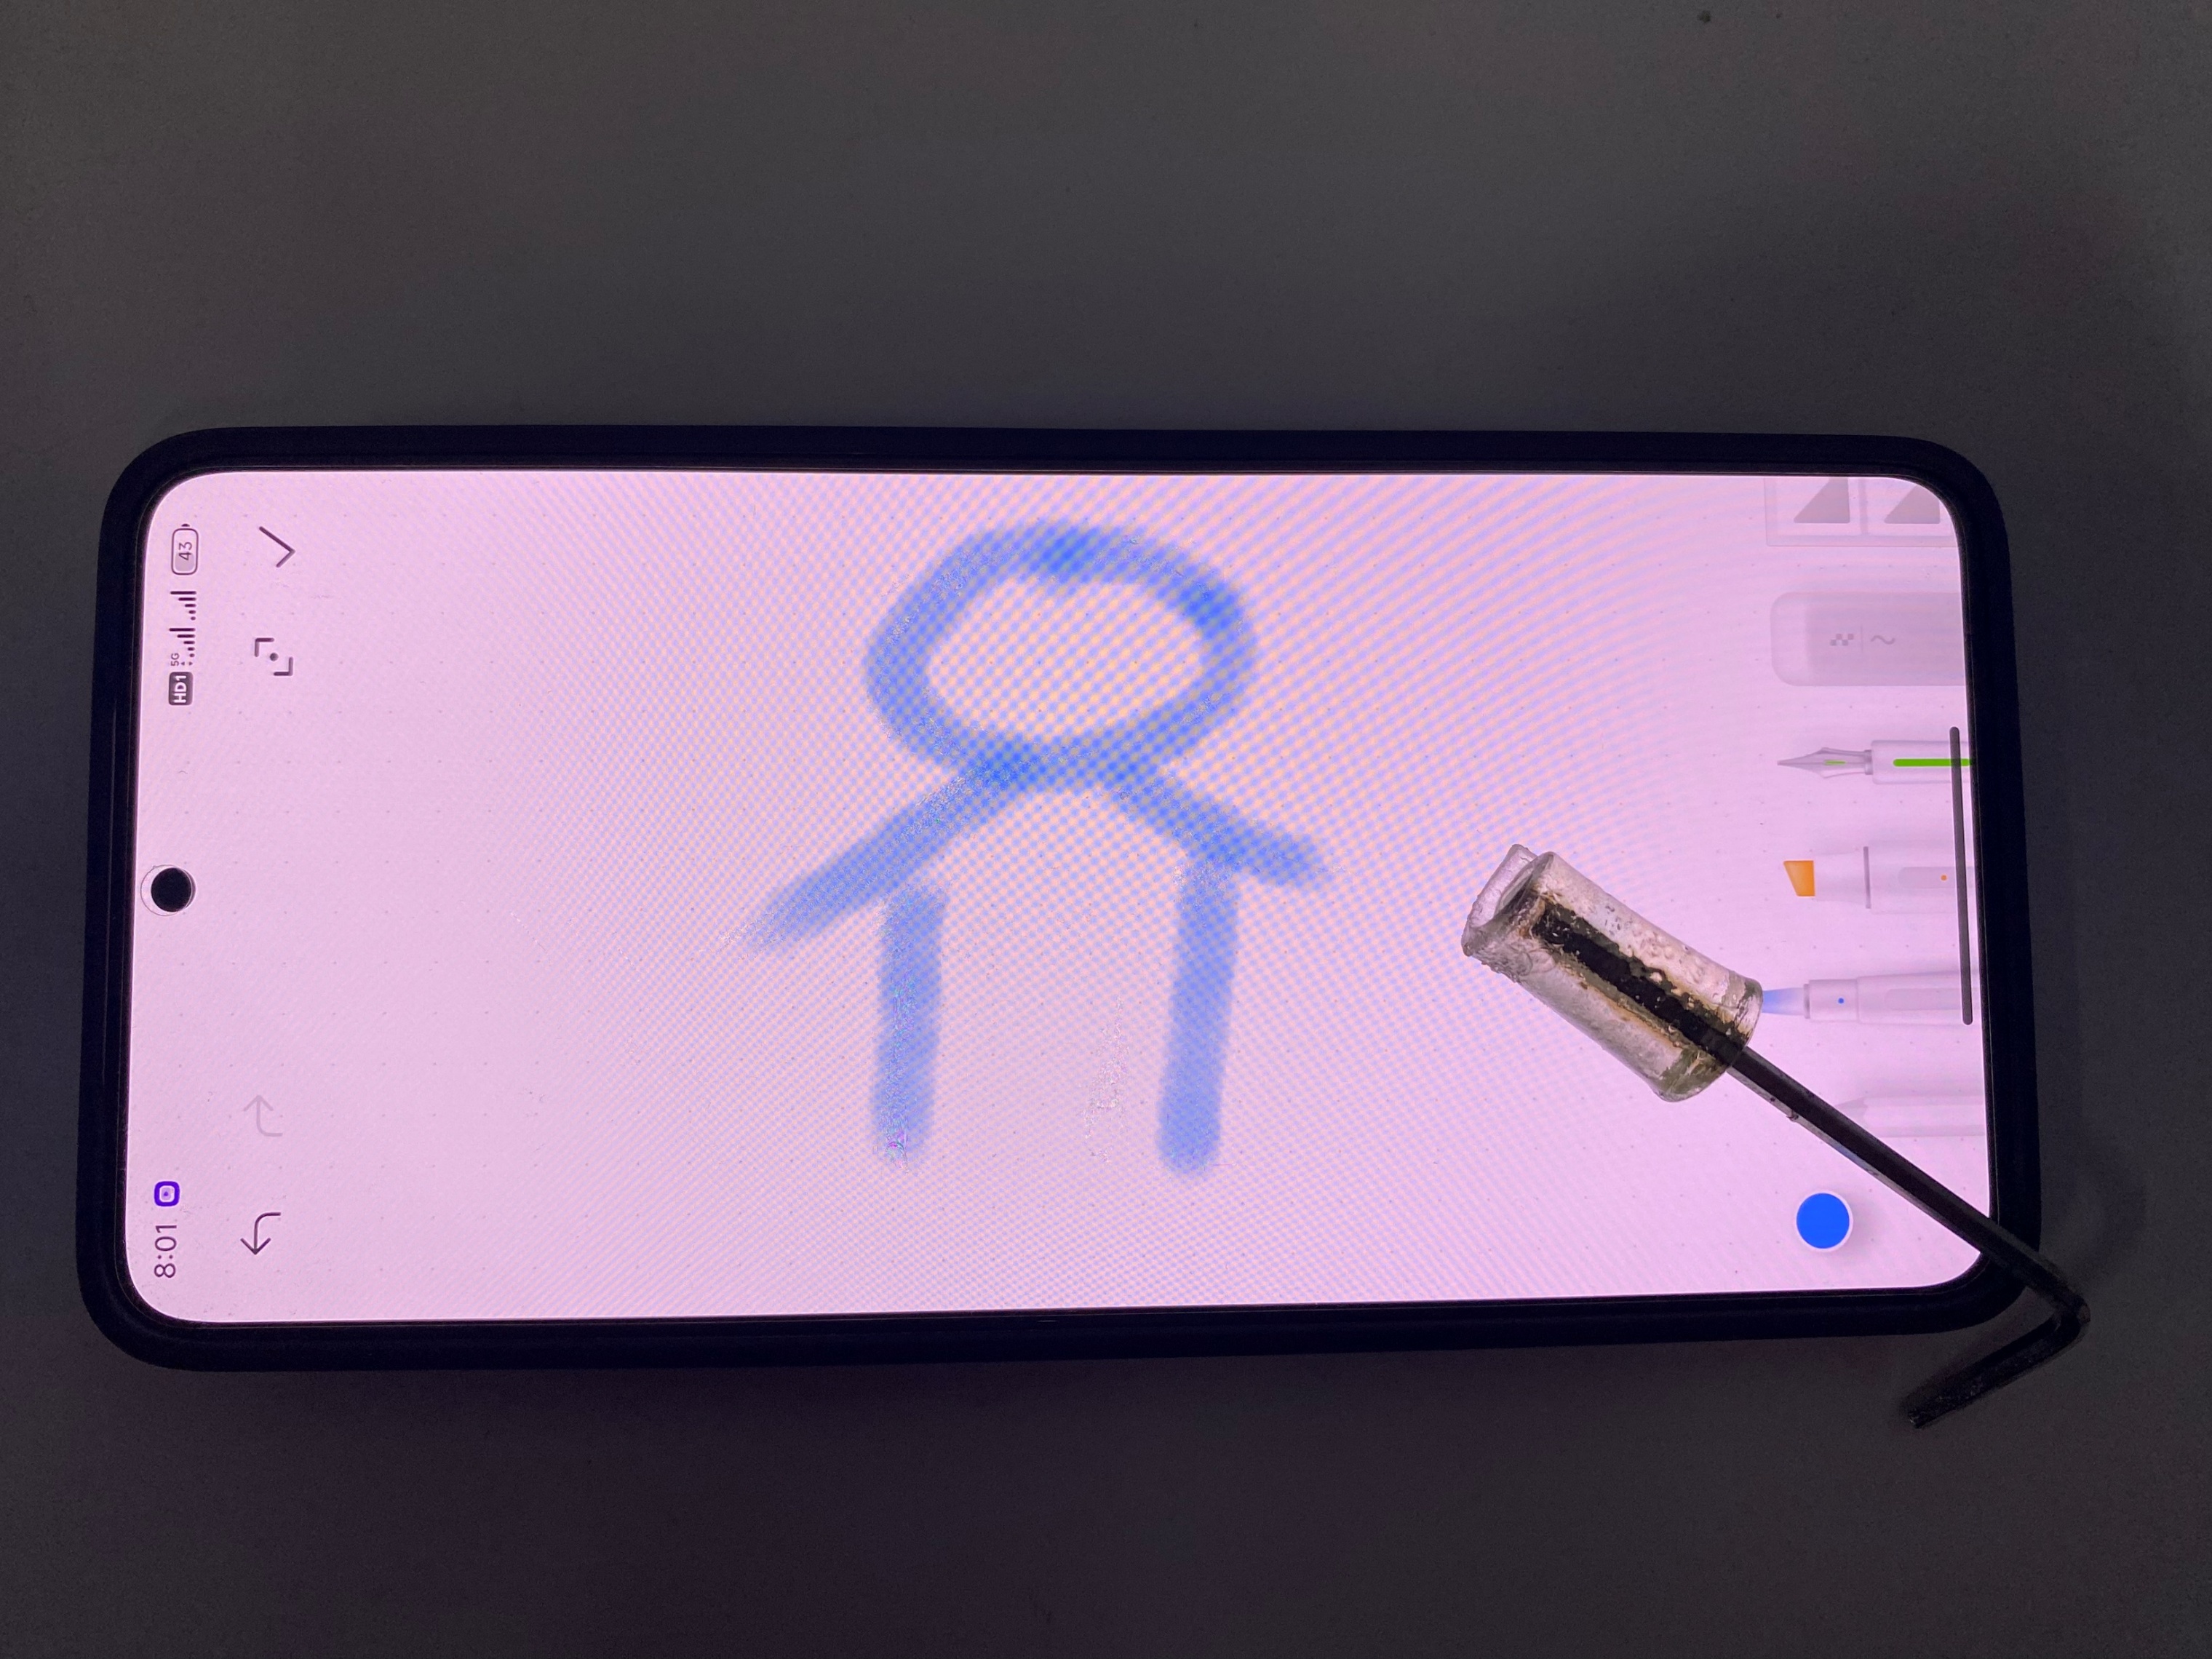
 Supplementary Figure 3. Using PCGK-CT hydrogel to write letters (CJLU) and draw (villains) on smartphones.**

**
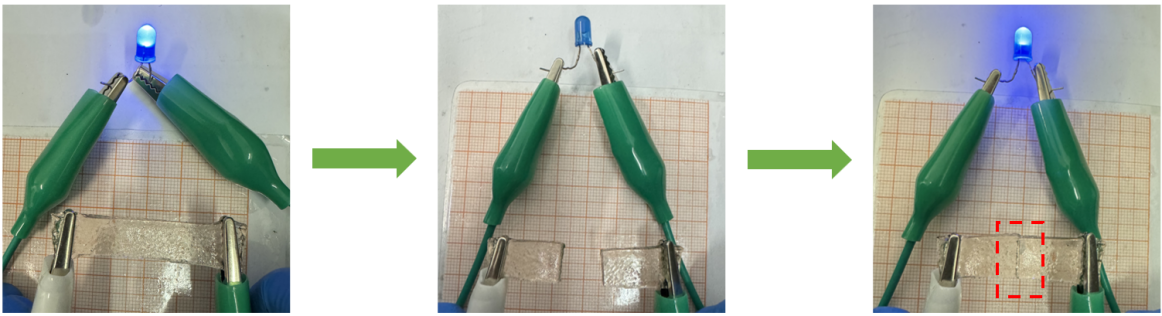
**

**Supplementary Figure 4. The self-repairing behavior of the hydrogel in the light-emitting diode circuit.**

**
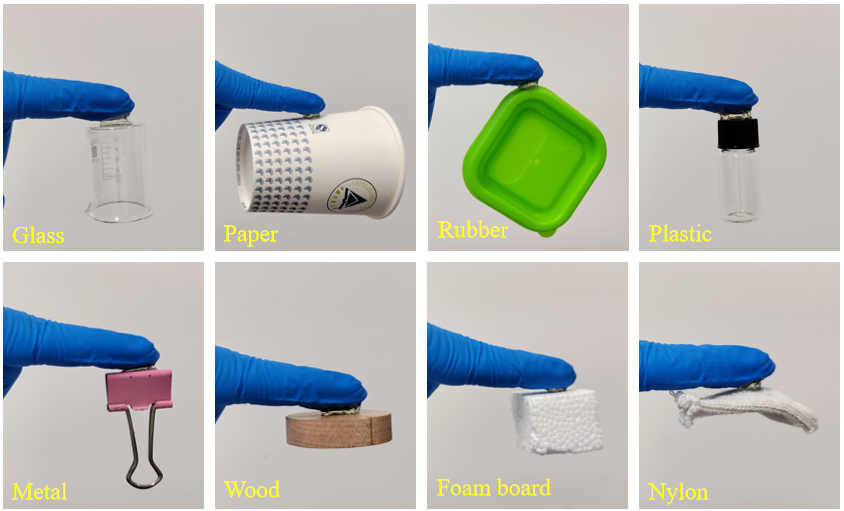
**

**Supplementary Figure 5. PCGK-CT hydrogels adhere to different materials, including glass, paper, rubber, plastic, metal, wood, foam and nylon**

**
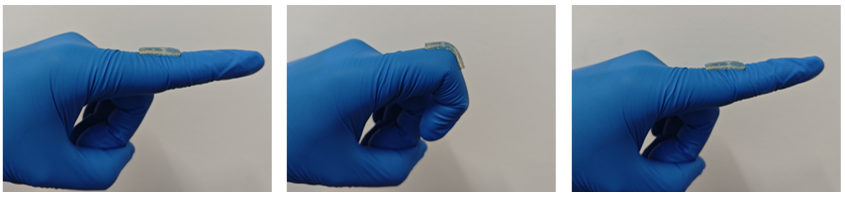
**

**Supplementary Figure 6. Hydrogels adhere to finger joints**

**
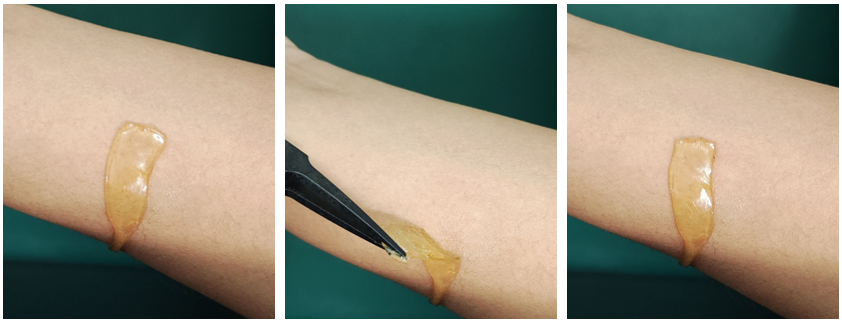
**

**Supplementary Figure 7. Peel and re-adhere to forearm skin**

**
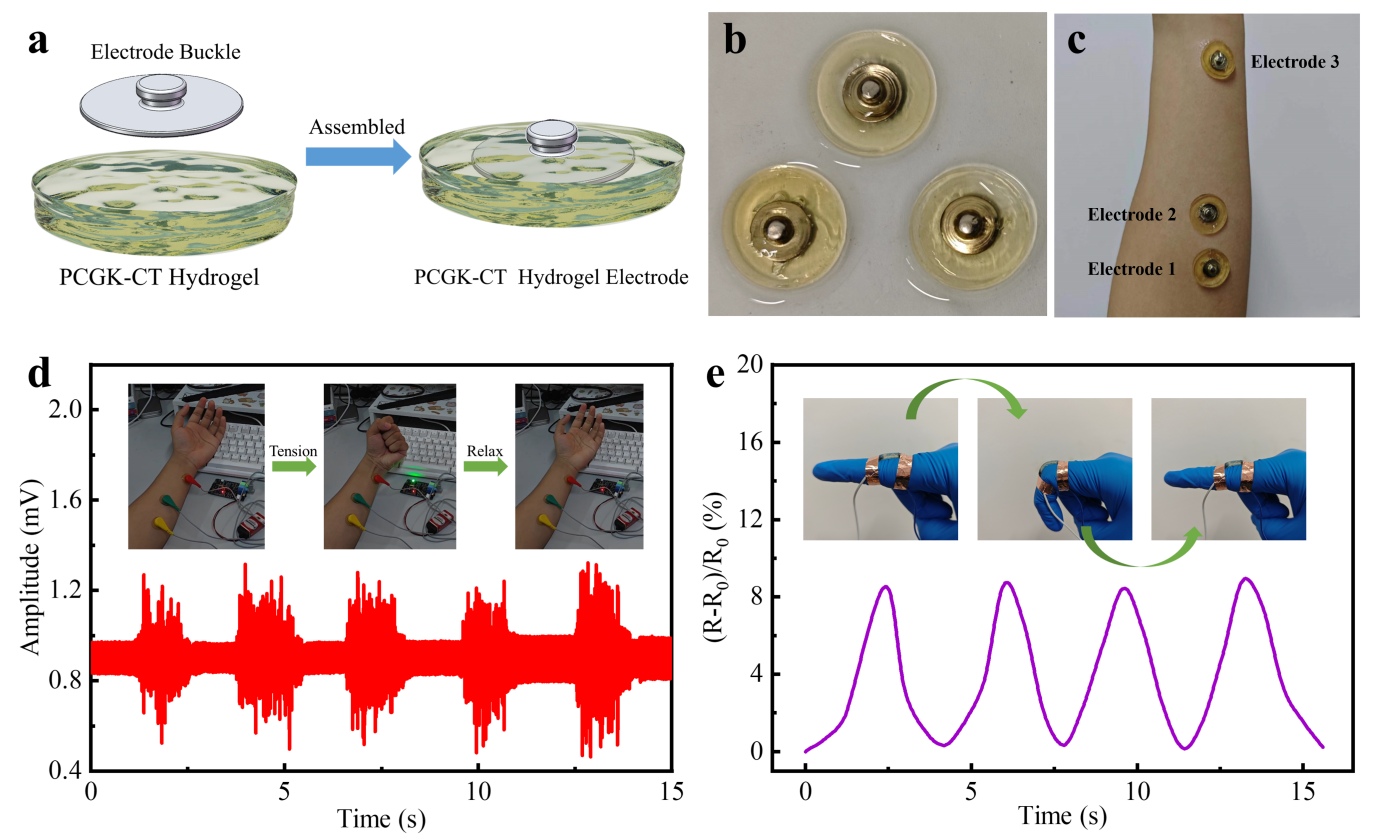
**

**Supplementary Figure 8. a Schematic diagram of PCGK-CT hydrogel electrode assembly. b PCGK-CT hydrogel electrode. c Electrode adhering to the skin surface of forearm.**

**
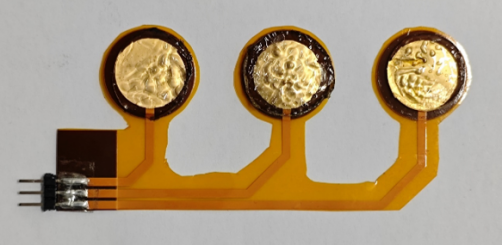
**

**Supplementary Figure 9. Physical diagram of hydrogel electrode integration design.**

**
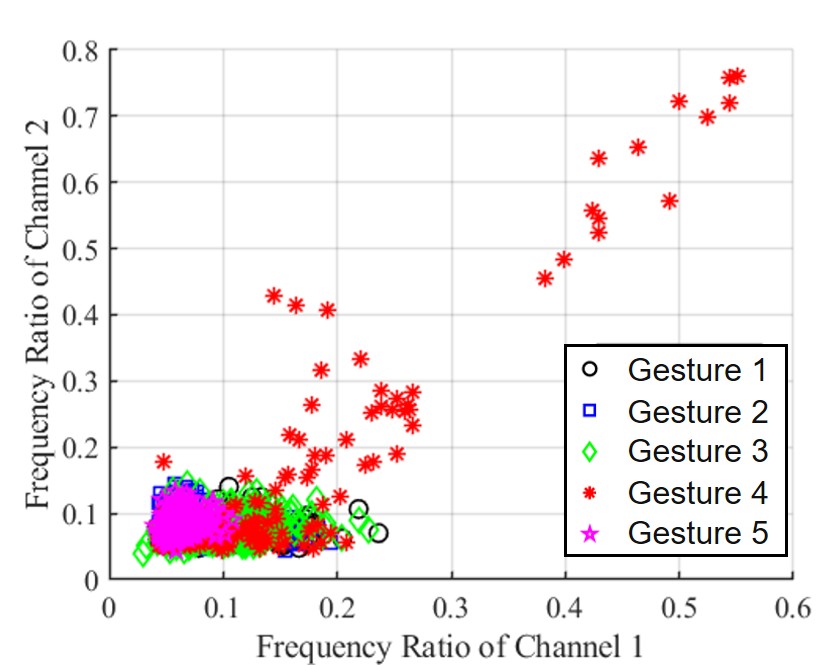
**

**Supplementary Figure 10. Frequency ratio scatter plot**

**
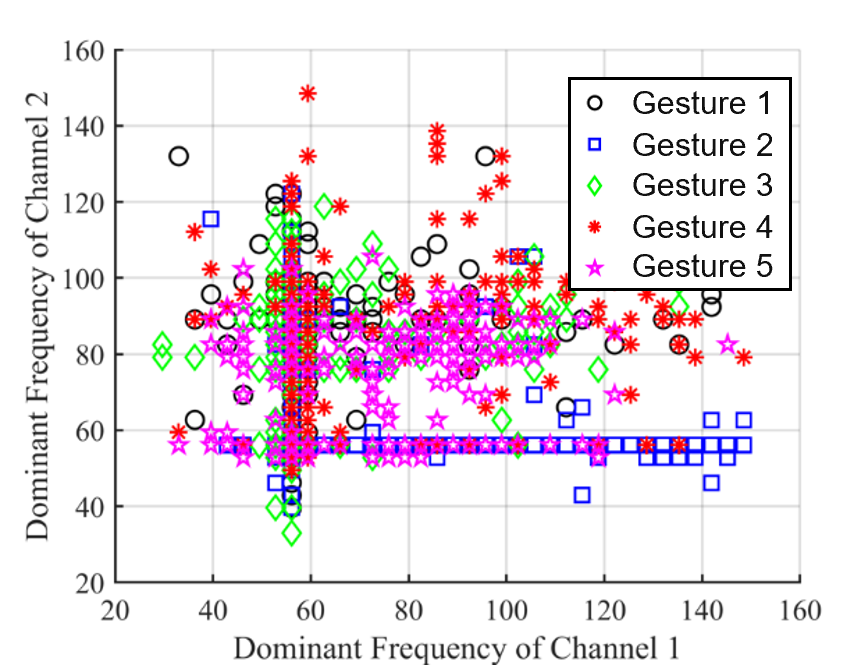
**

**Supplementary Figure 11. Dominant Frequency scatter plot**

**
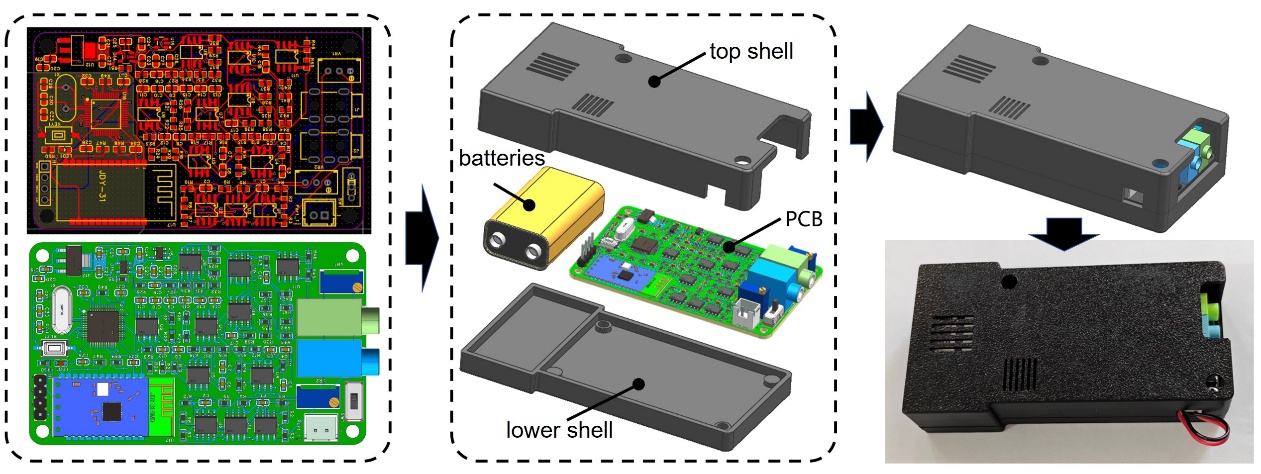
**

**Supplementary Figure 12. Circuit design of the sEMG acquisition system**

**
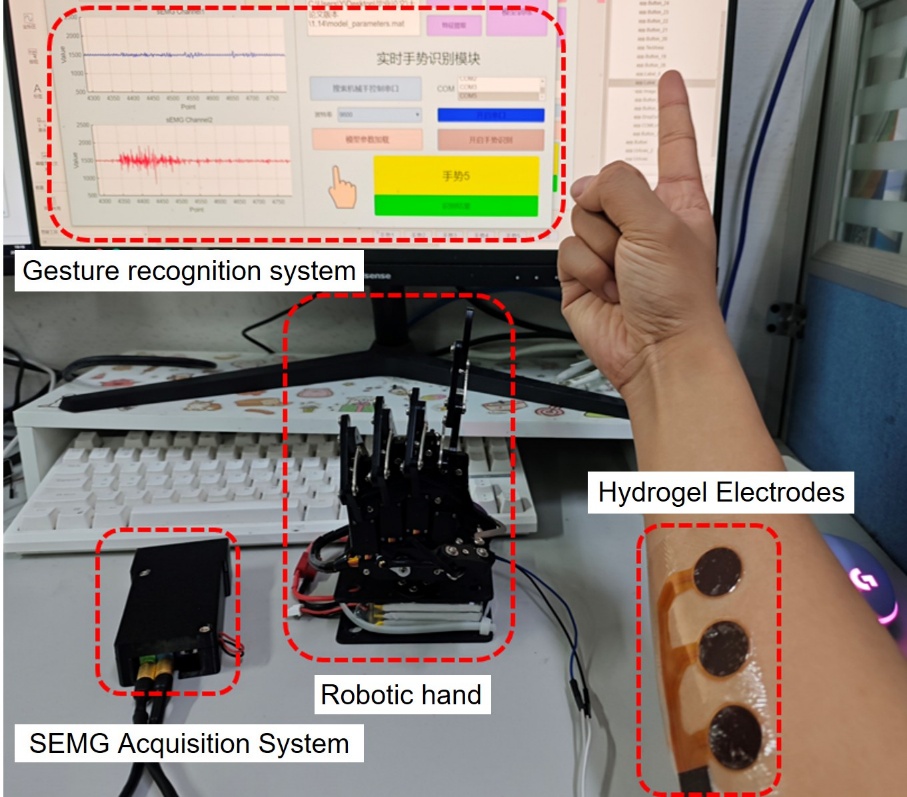
**

**Supplementary Figure 13. Physical drawing of the experimental platform**
